# Supplementary material for: Magnetic multiwall carbon nanotubes modified with dual hydroxy functional ionic liquid for the solid-phase extraction of protein
Source: Royal Society of Chemistry journal article supplement (doi:10.1039/c5an00201j), 2015-01-01
Supplement: c5an00201j1.pdf [file c5an00201j1.pdf]

## Supporting Information

### **Magnetic Multiwall Carbon Nanotube Modified with Dual Hydroxy Functional Ionic Liquid for the Solid-phase Extraction of Protein**

Jing Chen <sup>a</sup>, Yuzhi Wang <sup>a\*</sup>, Yanhua Huang <sup>a</sup>, Kaijia Xu <sup>a</sup>, Na Li <sup>a</sup>, Qian Wen <sup>a</sup>, Yigang Zhou <sup>b</sup>

<sup>a</sup> State Key Laboratory of Chemo/Biosensing and Chemometrics, College of Chemistry and Chemical Engineering, Hunan University, Changsha, 410082, P.R. China

<sup>b</sup> Department of Microbiology, College of Basic Medicine, Central South University, Changsha, 410083, P.R. China

**Corresponding author: Professor Yuzhi Wang**

State Key Laboratory of Chemo/Biosensing and Chemometrics

College of Chemistry and Chemical Engineering

Hunan University

Changsha 410082

P. R. China

Phone: +86-731-88821903

Fax: +86-731-88821848

E-mail: [wyzss@hnu.edu.cn](mailto:wyzss@hnu.edu.cn)

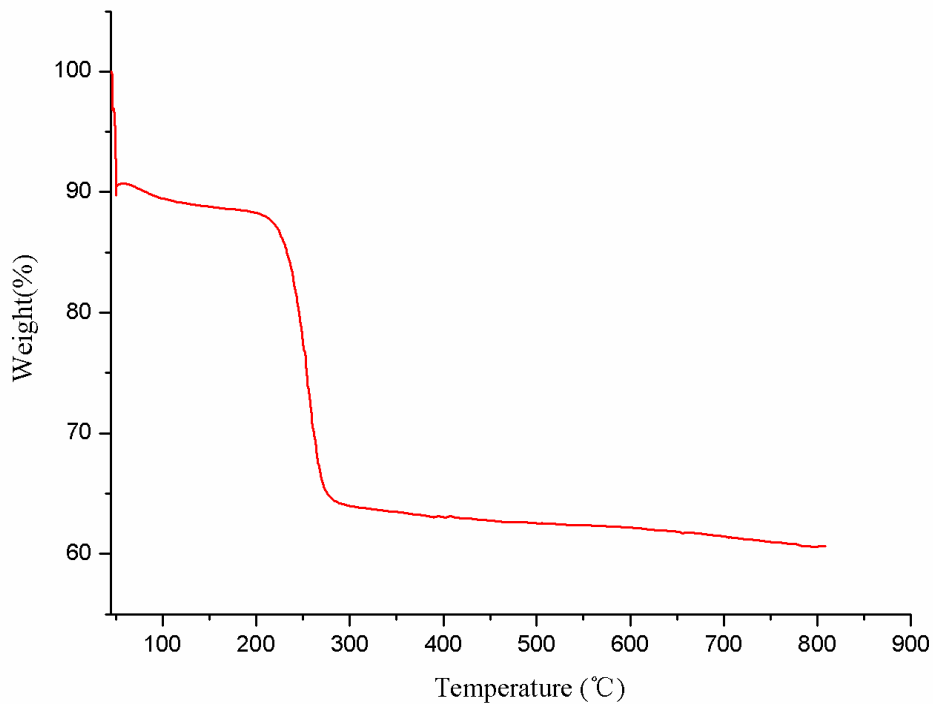

**Fig. S1** TGA curves of [OH]-FIL-m-MWCNTs@SiO<sub>2</sub>.

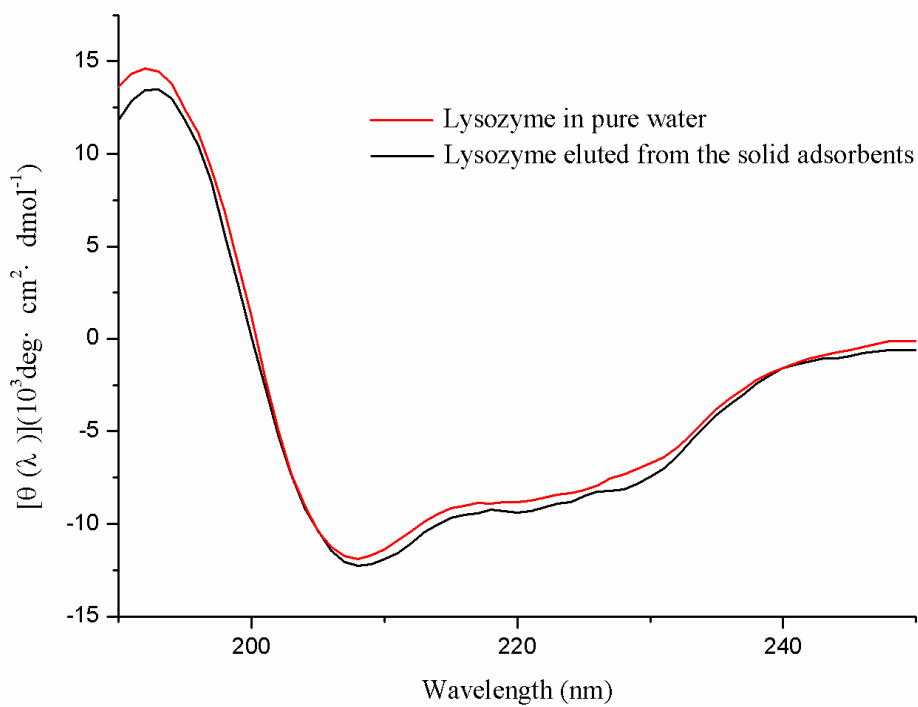

**Fig. S2** The CD spectra of Lys in pure water and eluted from the solid adsorbents after extraction.

**Table S1****Table S1a****The types of ILs**

| ILs      | Cation | Anion           |
|----------|--------|-----------------|
| [OH]-FIL |        | Cl <sup>-</sup> |
| alkly-IL |        | Cl <sup>-</sup> |

**Table S1b****(A) <sup>1</sup>H-NMR spectra of the investigated IL****(B) <sup>13</sup>C-NMR spectra of the investigated ILs**

|    | <b>(A) <sup>1</sup>H NMR (<math>\delta</math>, <math>\times 10^{-6}</math>)<sup>a</sup></b> |                        | <b>(B) <sup>13</sup>C NMR (<math>\delta</math>, <math>\times 10^{-6}</math>)<sup>b</sup></b> |                        |
|----|---------------------------------------------------------------------------------------------|------------------------|----------------------------------------------------------------------------------------------|------------------------|
|    | FILs(DMSO) <sup>c</sup>                                                                     | ILs(DMSO) <sup>c</sup> | FILs(DMSO) <sup>c</sup>                                                                      | ILs(DMSO) <sup>c</sup> |
| 1  | 3.809(t, 2H)                                                                                | 1.220(t,3H)            | 64.912                                                                                       | 30.944                 |
| 2  | 3.403-3.082(m,2H)                                                                           | 3.374(q,2H)            | 60.834                                                                                       | 58.583                 |
| 3  | 3.101(s,6H)                                                                                 | 3.031(s,6H)            | 51.176                                                                                       | 62.516                 |
| 4  | 3.403-3.082(m,2H)                                                                           | 3.267(t,2H)            | 55.218                                                                                       | 49.589                 |
| 5  | 1.416(m,2H)                                                                                 | 1.644(m,2H)            | 26.071                                                                                       | 25.729                 |
| 6  | 1.317-1.260(m,2H)                                                                           | 1.295-1.238(m,2H)      | 22.204                                                                                       | 22.153                 |
| 7  | 1.317-1.260(m,2H)                                                                           | 1.295-1.238(m,2H)      | 25.401                                                                                       | 21.869                 |
| 8  | 1.685-1.675(m,2H)                                                                           | 1.295-1.238(m,2H)      | 32.582                                                                                       | 14.090                 |
| 9  | 3.403-3.082(m,2H)                                                                           | 0.879(t,3H)            | 64.388                                                                                       | 8.096                  |
| 10 | 4.461(s,1H)                                                                                 | -                      | -                                                                                            | -                      |
| 11 | 5.571(s,1H)                                                                                 | -                      | -                                                                                            | -                      |

<sup>a</sup> Note: <sup>1</sup>H-NMR chemical shifts are reported downfield from trimethylsilane (TMS). Multiplicities are abbreviated as s=singlet, d=doublet, quart =quartet, t=triplet and m= multiplet.

<sup>b</sup> Note: <sup>13</sup>C-NMR chemical shifts are reported downfield from trimethylsilane (TMS).

<sup>c</sup>The two ILs were recorded on Varian-INOVA 400 NMR spectrometry.

| Precision measurement results (n=3)     |      |      |      |
|-----------------------------------------|------|------|------|
| Repeats                                 | 1    | 2    | 3    |
| Extraction amounts (mg/g)               | 94.5 | 95.2 | 94.9 |
| RSD (%)                                 | 0.37 |      |      |
| Repeatability measurement results (n=3) |      |      |      |
| Sample number                           | 1    | 2    | 3    |
| Extraction amounts (mg/g)               | 94.1 | 94.9 | 95.3 |
| RSD (%)                                 | 0.47 |      |      |
| Stability measurement results (n=3)     |      |      |      |
| Day number                              | 1    | 2    | 3    |
| Extraction amounts (mg/g)               | 94.4 | 95.2 | 95.3 |
| RSD (%)                                 | 0.52 |      |      |

**Table S2 The results of the precision, repeatability and stability experiments**
